# Supplementary material for: Individualized, perioperative, hemodynamic goal-directed therapy in major abdominal surgery (iPEGASUS trial): study protocol for a randomized controlled trial
Source: Springer Nature journal article supplement (doi:10.1186/s13063-018-2620-9), 2018-05-09
Supplement: MOESM4 [file 15751284]

**Table a1:** Overview of the Guidelines on Management of Severe Bleeding. Modified, based on the *Guidelines from the European Society of Anaesthesiology (ESA)* [21].

|                                                                                                                                                                                                                                                                                                                                                                                                                                                                                                                                                                                                                                                                                                                                                                                                                                                                                                              |
|--------------------------------------------------------------------------------------------------------------------------------------------------------------------------------------------------------------------------------------------------------------------------------------------------------------------------------------------------------------------------------------------------------------------------------------------------------------------------------------------------------------------------------------------------------------------------------------------------------------------------------------------------------------------------------------------------------------------------------------------------------------------------------------------------------------------------------------------------------------------------------------------------------------|
| <p>Optimising Macrocirculation</p> <ul style="list-style-type: none"> <li>- aggressive and timely stabilisation of cardiac preload</li> <li>- avoidance of hypervolemia with crystalloids or colloids [...] beyond an optimal cardiac preload</li> <li>- against the use of central venous pressure and pulmonary artery occlusion pressure as the only variables to guide fluid therapy, [...] optimise preload during severe bleeding, dynamic assessment of fluid responsiveness and non-invasive measurement of cardiac output should be considered</li> <li>- replacement of extracellular fluid losses with isotonic crystalloids in a timely and protocol-based manner</li> <li>- haemodynamic stabilization with iso-oncotic colloids, such as human albumin and hydroxyethyl starch</li> <li>- use of balanced solutions for crystalloids as a basic solute for iso-oncotic preparations</li> </ul> |
| <p>Transfusion triggers</p> <ul style="list-style-type: none"> <li>- a target haemoglobin concentration of 7–9g/dl during active bleeding</li> <li>- a restrictive transfusion strategy [...] is beneficial in reducing exposure to allogeneic blood products</li> </ul>                                                                                                                                                                                                                                                                                                                                                                                                                                                                                                                                                                                                                                     |
| <p>Oxygen fraction</p> <ul style="list-style-type: none"> <li>- inspiratory oxygen fraction should be high enough to prevent arterial hypoxaemia in bleeding patients, while avoiding extensive hyperoxia (PaO<sub>2</sub>&gt;26.7 kPa [200 mmHg])</li> </ul>                                                                                                                                                                                                                                                                                                                                                                                                                                                                                                                                                                                                                                                |
| <p>Monitoring tissue perfusion</p> <ul style="list-style-type: none"> <li>- repeated measurements of a combination of haematocrit/haemoglobin, serum lactate, and base deficit</li> <li>- extended by measurement of cardiac output, dynamic parameters of volume status (e.g. stroke volume variation, pulse pressure variation) and central venous oxygen saturation</li> </ul>                                                                                                                                                                                                                                                                                                                                                                                                                                                                                                                            |
| <p>Coagulation management / Antifibrinolytics and tranexamic acid</p>                                                                                                                                                                                                                                                                                                                                                                                                                                                                                                                                                                                                                                                                                                                                                                                                                                        |
| <p>Correction of confounding factors</p>                                                                                                                                                                                                                                                                                                                                                                                                                                                                                                                                                                                                                                                                                                                                                                                                                                                                     |
