# Supplementary material for: Individualized, perioperative, hemodynamic goal-directed therapy in major abdominal surgery (iPEGASUS trial): study protocol for a randomized controlled trial
Source: Springer Nature journal article supplement (doi:10.1186/s13063-018-2620-9), 2018-05-09
Supplement: MOESM5 [file 15751284]

**Table a2:** Overview of the Single Organ Outcome Failures and their Severity Grading. Modified, based on the consensus statement of the ESA (European Society of Anesthesiology) -ESICM (European Society of Intensive Care Medicine) joint taskforce on perioperative outcome measures [22].

| Single Organ Outcome Failure                       | Severity Grading                                                                                                                                                                                                                                                                                                                                                                                                                                              |
|----------------------------------------------------|---------------------------------------------------------------------------------------------------------------------------------------------------------------------------------------------------------------------------------------------------------------------------------------------------------------------------------------------------------------------------------------------------------------------------------------------------------------|
| Anastomotic breakdown                              | <p><u>Mild:</u> Results in only temporary harm and would not usually require specific clinical treatment.</p> <p><u>Moderate:</u> More serious complication but one which does not usually result in permanent harm or functional limitation. Usually requires clinical treatment.</p> <p><u>Severe:</u> Results in significant prolongation of hospital stay and/or permanent functional limitation or death. Almost always requires clinical treatment.</p> |
| Arrhythmia                                         |                                                                                                                                                                                                                                                                                                                                                                                                                                                               |
| Cardiogenic pulmonary oedema                       |                                                                                                                                                                                                                                                                                                                                                                                                                                                               |
| Deep vein thrombosis (DVT)                         |                                                                                                                                                                                                                                                                                                                                                                                                                                                               |
| Gastrointestinal bleed                             |                                                                                                                                                                                                                                                                                                                                                                                                                                                               |
| Infection, source uncertain                        |                                                                                                                                                                                                                                                                                                                                                                                                                                                               |
| Laboratory confirmed bloodstream infection         |                                                                                                                                                                                                                                                                                                                                                                                                                                                               |
| Myocardial infarction                              |                                                                                                                                                                                                                                                                                                                                                                                                                                                               |
| Pneumonia                                          |                                                                                                                                                                                                                                                                                                                                                                                                                                                               |
| Paralytic ileus                                    |                                                                                                                                                                                                                                                                                                                                                                                                                                                               |
| Postoperative haemorrhage                          |                                                                                                                                                                                                                                                                                                                                                                                                                                                               |
| Pulmonary embolism (PE)                            |                                                                                                                                                                                                                                                                                                                                                                                                                                                               |
| Stroke                                             |                                                                                                                                                                                                                                                                                                                                                                                                                                                               |
| Surgical site infection (superficial)              |                                                                                                                                                                                                                                                                                                                                                                                                                                                               |
| Surgical site infection (deep)                     |                                                                                                                                                                                                                                                                                                                                                                                                                                                               |
| Surgical site infection (organ/space)              |                                                                                                                                                                                                                                                                                                                                                                                                                                                               |
| Urinary tract infection                            |                                                                                                                                                                                                                                                                                                                                                                                                                                                               |
| Acute kidney injury (AKI)                          | Integrated in the definition.                                                                                                                                                                                                                                                                                                                                                                                                                                 |
| Acute respiratory distress syndrome (ARDS)         |                                                                                                                                                                                                                                                                                                                                                                                                                                                               |
| Delirium                                           |                                                                                                                                                                                                                                                                                                                                                                                                                                                               |
| Cardiac arrest                                     | Binary outcome (yes/no).                                                                                                                                                                                                                                                                                                                                                                                                                                      |
| Myocardial injury after non-cardiac surgery (MINS) |                                                                                                                                                                                                                                                                                                                                                                                                                                                               |
